# Supplementary material
Source: PubMed Central journal article supplement (PMC6387686)
Supplement: NIHMS1008256-supplement-1.pdf [file NIHMS1008256-supplement-1.pdf]

## **Supplementary appendix**

This appendix formed part of the original submission and has been peer reviewed.  
We post it as supplied by the authors.

Supplement to: Heery CR, O'Sullivan-Coyne G, Madan RA, et al. Avelumab for metastatic or locally advanced previously treated solid tumours (JAVELIN Solid Tumor): a phase 1a, multicohort, dose-escalation trial.

**This appendix is a supplement to: Heery CR, O’Sullivan-Coyne G, Madan RA, Cordes L, Rajan A, Rauckhorst M, et al., Avelumab for metastatic or locally advanced previously treated solid tumours: a phase 1a dose-escalation cohort of the multicohort JAVELIN Solid Tumor trial**

The authors’ full names and academic degrees are as follows: Christopher R. Heery, MD, Geraldine O’Sullivan-Coyne, MD, PhD, Ravi A. Madan, MD, Lisa Cordes, PhD, Arun Rajan, MD, Myrna Rauckhorst, RN, Elizabeth Lamping, RN, Israel Oyelakin, RN, Jennifer L. Marté, MD, Lauren M. Lepone, PhD, Renee N. Donahue, PhD, Italia Grenga, PhD, Jean-Marie Cuillerot, MD, Berend Neuteboom, PhD, Anja von Heydebreck, PhD, Kevin Chin, MD, Jeffrey Schlom, PhD, James L. Gulley, MD, PhD, F.A.C.P

The authors’ affiliations are as follows: Laboratory of Tumour Immunology and Biology, National Cancer Institute, National Institutes of Health, Bethesda, MD, USA (C.R.H., I.O., L.M.L., R.N.D., I.G., J.S.); Genitourinary Malignancies Branch, National Cancer Institute, National Institutes of Health, Bethesda, MD, USA (G.O., R.A.M., J.L.M.); Pharmacy Department, National Institutes of Health Clinical Center, Bethesda, MD, USA (L.C.); Thoracic and Gastrointestinal Oncology Branch National Cancer Institute, National Institutes of Health, Bethesda, MD, USA (A.R.); Office of Research Nursing, National Cancer Institute National Institutes of Health Bethesda, MD, USA (M.R., E.L.); EMD Serono, Billerica, MA, USA (J.-M.C., B.N., K.C.); Merck KGaA, Darmstadt, Germany (A.v.H.); Genitourinary Malignancies Branch, National Cancer Institute, National Institutes of Health, Bethesda, Maryland, USA, and Laboratory of Tumor Immunology and Biology, Center for Cancer Research, National Cancer Institute, National Institutes of Health, Bethesda, Maryland, USA (J.L.M).

**Corresponding author**

James L. Gulley, MD, PhD, F.A.C.P; Genitourinary Malignancies Branch, National Cancer Institute, National Institutes of Health, Bethesda, Maryland, USA, and Laboratory of Tumor Immunology and Biology, Center for Cancer Research, National Cancer Institute, National Institutes of Health, Bethesda, Maryland, USA 20892; Phone: 301-435-2956; email: gulleyj@mail.nih.gov

Clinical trial registration number: NCT01772004

**Table of contents**

|                                                                                                                                     |         |
|-------------------------------------------------------------------------------------------------------------------------------------|---------|
| Supplementary Methods: Cytokine release by human peripheral blood mononuclear cells                                                 | Page 2  |
| Table S1. In vitro cytokine release by pooled PBMCs in the presence of LPS                                                          | Page 3  |
| Table S2. In vitro cytokine release by pooled PBMCs in the presence of PHA                                                          | Page 3  |
| Figure S1. Serum concentrations of IFN- $\gamma$ , IL-6, and TNF- $\alpha$ for patients in the avelumab 10 and 20 mg/kg dose groups | Page 4  |
| Figure S2. Evidence of clinical activity with avelumab in phase 1 dose-escalation cohort                                            | Page 10 |
| Table S3. Evaluation of standard and PD-L1-expressing immune cell subsets at baseline, day 15, day 43, and day 127                  | Page 11 |

## Supplementary Methods: Cytokine release by human peripheral blood mononuclear cells

Studies were conducted to assess the potential of avelumab to induce *in vitro* cytokine release from human peripheral blood mononuclear cells (PBMC) obtained from healthy donors who were exposed to avelumab *in vitro* in the presence of lipopolysaccharide (LPS) or phytohaemagglutinin (PHA).

In a first experiment, isolated PBMCs from eight male and eight female human donors were pooled and tested separately. Cells were treated with avelumab concentrations ranging from 0.01–14 µg/mL. LPS 10 µg/mL and alemtuzumab (Campath) 30 µg/mL were used as positive controls. The following Th1 and Th2 cytokines were measured using xMAP Luminex multiplex assay after 6 and 24 hours of exposure using Luminex 10-plex and single-plex assay kits: granulocyte macrophage colony-stimulating factor (GM-CSF), interferon (IFN)-γ, interleukin (IL)-1β, IL-2, IL-4, IL-5, IL-6, IL-8, IL-10, tumor necrosis factor α (TNF-α), monocyte chemotactic protein 1 (MCP-1), and IFN-inducible protein 10 (IP-10). As expected, positive control compounds induced release of pro-inflammatory cytokines by PBMCs. For example, LPS induced release of multiple cytokines (IFN-γ, IL-1β, IL-6, IL-8 and TNF-α) by PBMC from both male and female donors, with 100–200-fold increases over baseline for TNF-α and IL-6 (Table S1). Alemtuzumab induced a modest seven-fold increase in release of TNF-α compared with baseline. Exposure to avelumab for 6 hours resulted in weak responses, with only a three-fold increase in TNF-α release observed in male PBMC. Effects were greater after 24 hours compared with 6 hours of exposure, with TNF-α release six-fold and 11-fold higher than baseline in male and female PBMC, respectively. IL-6, IP-10 and MCP-1 showed a two-fold increase over baseline in female PBMC only.

In a second experiment, cytokine release profiles were assessed in PBMC from 16 human donors (eight male and eight female) that had been prestimulated with PHA. In these studies, avelumab was immobilised to 24 well polystyrene microtitre plates using a wet pre-coating technique (for method descriptions, refer to Findlay et al. 2010 and Stebbings et al. 2007), and avelumab concentrations of 2–2000 µg/mL were tested. LPS 10 µg/mL and alemtuzumab 300 µg/mL were used as positive controls. Table S2 shows release of IL-6 and TNF-α, important cytokines involved in acute phase reactions and other immune reactions. Avelumab caused a notable release in IL-6 and TNFα, with strong increases observed at the lowest avelumab concentration tested (i.e. 2 µg/mL). Different profiles were obtained in activated PBMCs from male vs female donors, in that alongside the IL-6/TNF-α response, GM-CSF and IL-10 were also induced; IL-10 was likely a direct response to the initial acute phase response. Weaker and sporadic increases in IL-8 and IL-1β were also observed in PBMCs from both sexes.

Based on these results, the risk of systemic cytokine release could not be excluded and further investigations to clinically evaluate this risk were conducted in patients enrolled in the phase 1a dose-escalation trial of avelumab. Cytokine analysis was performed to evaluate levels of RANTES (regulated on activation, normal T cell expressed and secreted) and various interleukins (including IL-1β, IL-2, IL-4, IL-5, IL-6, IL-10, IL-12p70, IL-13, and IL-17), TNF-α, and IFN-γ. Serum samples used for analysis were obtained on study days 1 (baseline), 3 (48 ± 6hr), 8, 15, 29, 43, 45, 50 and 85 in the 1, 3, 10, and 20 mg/kg treatment cohorts. Figure S1 shows levels of IFN-γ, IL-6 and TNF-α for the 10 and 20 mg/kg dose groups. TNF-α was transiently increased to  $11.0 \pm 10.5$  pg/mL (mean ± standard deviation) in 10 mg/kg cohort samples on Day 8, and IFN-γ was transiently increased to  $2.7 \pm 1.9$  pg/mL in the 10 mg/kg cohort samples on Day 3 and returned to baseline levels of  $1.9 \pm 1.6$  pg/mL on Day 15. Concentrations of IFN-γ were low overall and did not exceed 6 pg/ml in individual subjects throughout the dosing interval. Overall, cytokine levels varied in serum with dose and time, but no clear pattern emerged.

## References

- Findlay L, Eastwood D, Stebbings R, et al. Improved *in vitro* methods to predict the *in vivo* toxicity in man of therapeutic monoclonal antibodies including TGN1412. *J Immunol Methods* 2010; **352**: 1–12. doi: 10.1016/j.jim.2009.10.013.
- Stebbing R, Findlay L, Edwards C, et al. "Cytokine storm" in the phase I trial of monoclonal antibody TGN1412: better understanding the causes to improve preclinical testing of immunotherapeutics. *J Immunol* 2007; **179**: 3325–31. doi: 10.4049/jimmunol.179.5.3325.

**Table S1. *In vitro* cytokine release by pooled PBMCs (500,000 cells/well) from male (M) and female (F) healthy donors following treatment with LPS 10 µg/mL, alemtuzumab (Campath) 30 µg/mL, or avelumab 0.01–14 µg/mL. For avelumab, the highest fold-increase observed is reported. Hyphens (-) indicate no change in cytokine level from baseline.**

| Cytokine      | Fold-increase over baseline |   |                |     |                        |   |                          |   |                |   |                |     |                        |   |                          |    |
|---------------|-----------------------------|---|----------------|-----|------------------------|---|--------------------------|---|----------------|---|----------------|-----|------------------------|---|--------------------------|----|
|               | 6 hours                     |   |                |     |                        |   |                          |   | 24 hours       |   |                |     |                        |   |                          |    |
|               | Vehicle* alone              |   | LPS (10 µg/mL) |     | Alemtuzumab (30 µg/mL) |   | Avelumab (0.01–14 µg/mL) |   | Vehicle* alone |   | LPS (10 µg/mL) |     | Alemtuzumab (30 µg/mL) |   | Avelumab (0.01–14 µg/mL) |    |
|               | M                           | F | M              | F   | M                      | F | M                        | F | M              | F | M              | F   | M                      | F | M                        | F  |
| GM-CSF        | -                           | - | -              | -   | -                      | - | -                        | - | -              | - | -              | -   | -                      | - | -                        | -  |
| IFN- $\gamma$ | -                           | - | -              | -   | -                      | - | -                        | - | -              | - | 20             | 4   | -                      | - | -                        | -  |
| IL-10         | -                           | - | -              | -   | -                      | - | -                        | - | -              | - | -              | -   | -                      | - | -                        | -  |
| IL-1 $\beta$  | -                           | - | 7              | 6   | -                      | - | -                        | - | -              | - | 8              | 2   | -                      | - | -                        | -  |
| IL-2          | -                           | - | -              | -   | -                      | - | -                        | - | -              | - | -              | -   | -                      | - | -                        | -  |
| IL-4          | -                           | - | -              | -   | -                      | - | -                        | - | -              | - | -              | -   | -                      | - | -                        | -  |
| IL-5          | -                           | - | -              | -   | -                      | - | -                        | - | -              | - | -              | -   | -                      | - | -                        | -  |
| IL-6          | -                           | 2 | 70             | 58  | -                      | - | -                        | - | -              | - | 200            | 140 | -                      | - | -                        | 2  |
| IL-8          | -                           | 2 | 4              | 2   | 2                      | 2 | -                        | - | -              | - | -              | -   | -                      | - | -                        | -  |
| IP-10         | -                           | - | -              | -   | -                      | - | -                        | - | -              | - | -              | -   | -                      | - | -                        | 2  |
| MCP-1         | -                           | 2 | -              | -   | 2                      | 2 | -                        | - | -              | - | -              | -   | 2                      | 3 | -                        | 2  |
| TNF- $\alpha$ | -                           | 5 | 130            | 130 | 7                      | 6 | 3                        | - | -              | - | 110            | 80  | 4                      | 3 | 6                        | 11 |

\* Vehicle per mL of water was D-mannitol (51 mg), glacial acetic acid (0.6 mg), polysorbate 20 (0.5 mg), and sodium hydroxide (0.3 mg).

**Table S2. *In vitro* cytokine release by pooled PBMCs (500,000 cells/well) from male (M) and female (F) healthy donors (mean and standard deviation) prestimulated with phytohaemagglutinin (PHA), and treated with LPS 10 µg/mL, alemtuzumab (Campath) 300 µg/mL, or avelumab 2–2000 µg/mL immobilised to microtitre plates. For avelumab, the highest fold-increase observed is reported.**

| 24-hour prestimulation with PHA (2.5 µg/mL) |      | Fold-increase over baseline |    |                         |    |                         |    |                |     |                         |     |                         |    |
|---------------------------------------------|------|-----------------------------|----|-------------------------|----|-------------------------|----|----------------|-----|-------------------------|-----|-------------------------|----|
|                                             |      | 6 hours                     |    |                         |    |                         |    | 24 hours       |     |                         |     |                         |    |
|                                             |      | LPS (10 µg/mL)              |    | Alemtuzumab (300 µg/mL) |    | Avelumab (2–2000 µg/mL) |    | LPS (10 µg/mL) |     | Alemtuzumab (300 µg/mL) |     | Avelumab (2–2000 µg/mL) |    |
| Cytokine                                    |      | M                           | F  | M                       | F  | M                       | F  | M              | F   | M                       | F   | M                       | F  |
| IL-6                                        | Mean | 79                          | 83 | 4                       | 37 | 6                       | 7  | 84             | 305 | 5                       | 144 | 18                      | 9  |
|                                             | SD   | 55                          | 80 | 2                       | 32 | 3                       | 3  | 49             | 251 | 3                       | 172 | 9                       | 4  |
| TNF- $\alpha$                               | Mean | 66                          | 10 | 10                      | 4  | 11                      | 36 | 31             | 3   | 29                      | 1   | 30                      | 62 |
|                                             | SD   | 82                          | 7  | 3                       | 3  | 7                       | 13 | 52             | 1   | 13                      | 1   | 20                      | 14 |

**Figure S1. Serum concentrations of IFN- $\gamma$ , IL-6, and TNF- $\alpha$  for patients in the avelumab 10 and 20 mg/kg dose groups, shown as line plots of individual patients and box plots.**

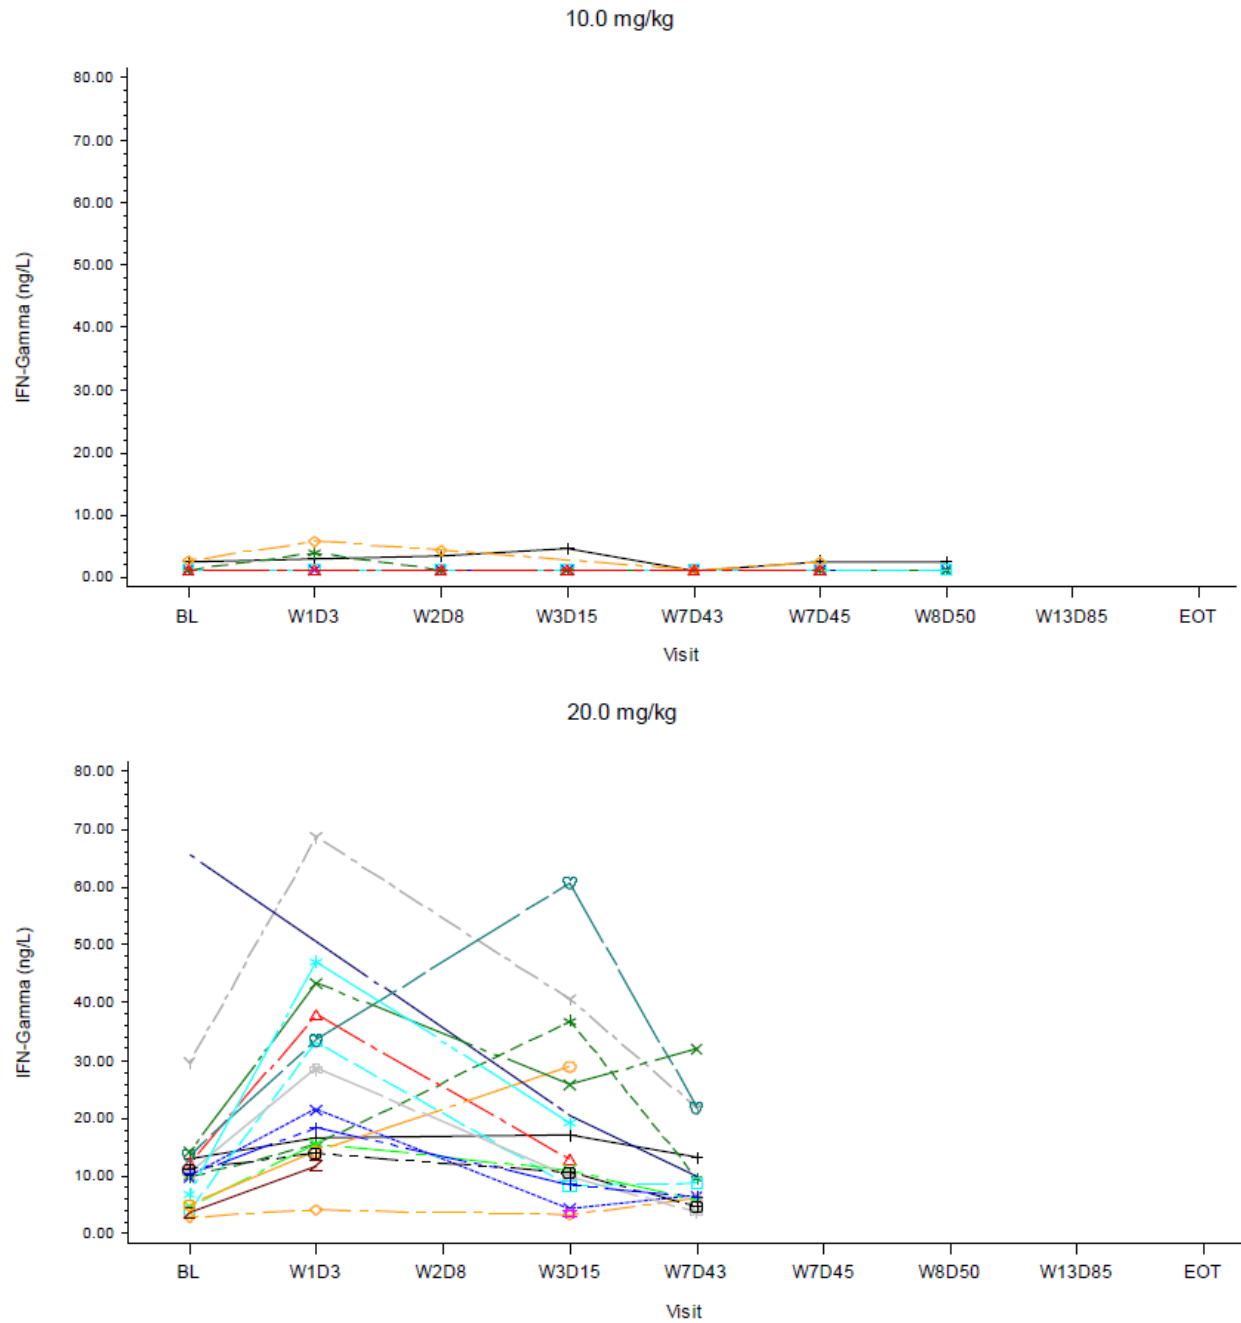

# Phase 1a dose-escalation trial of avelumab

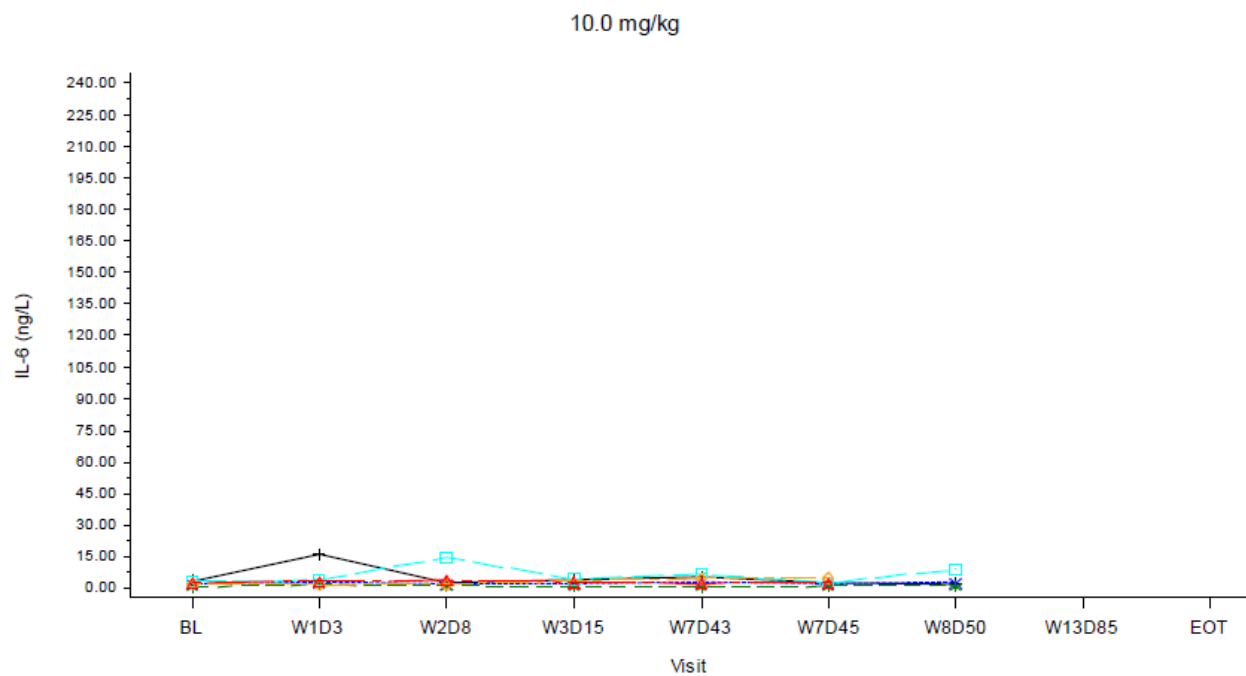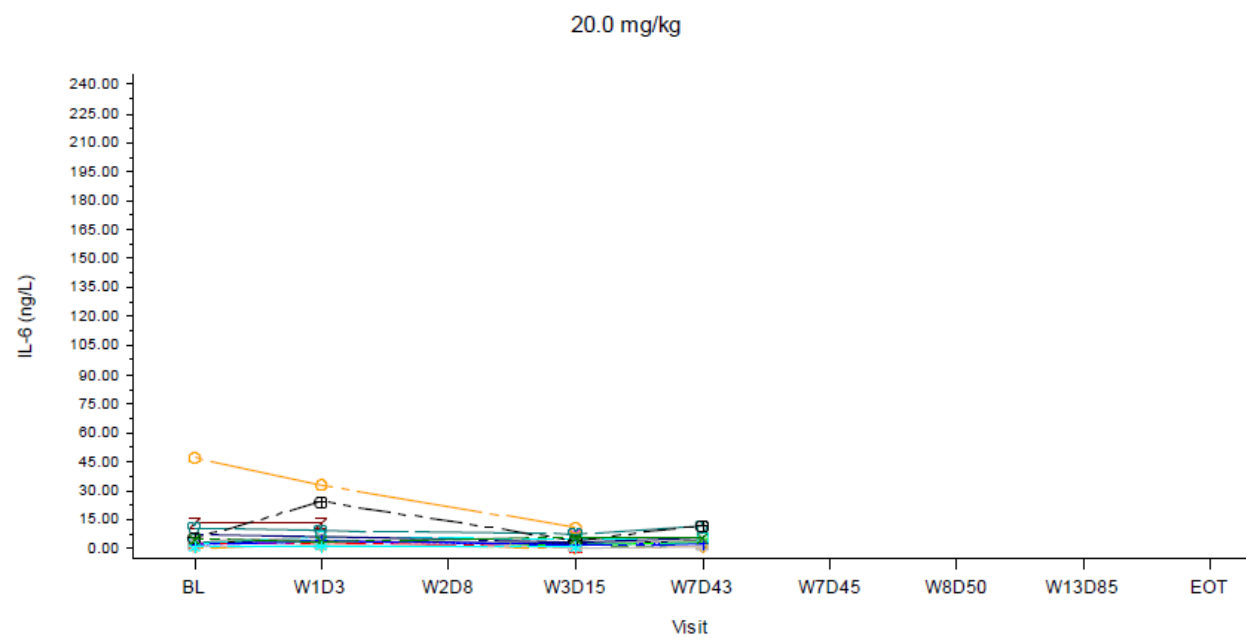

# Phase 1a dose-escalation trial of avelumab

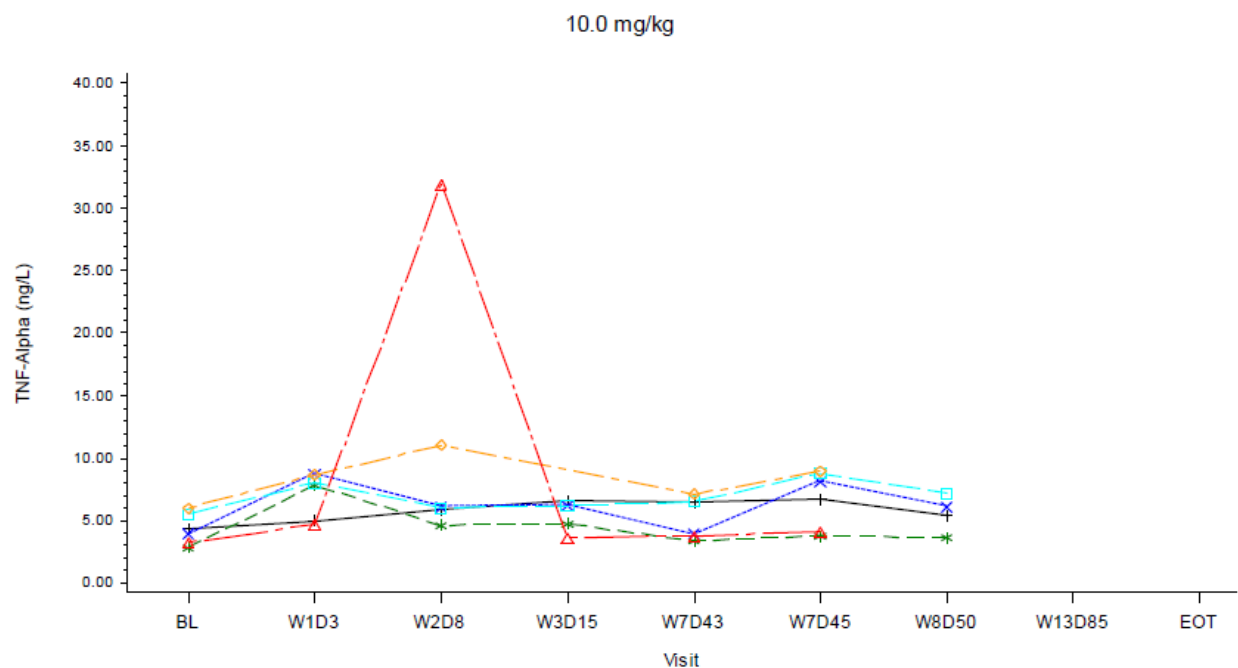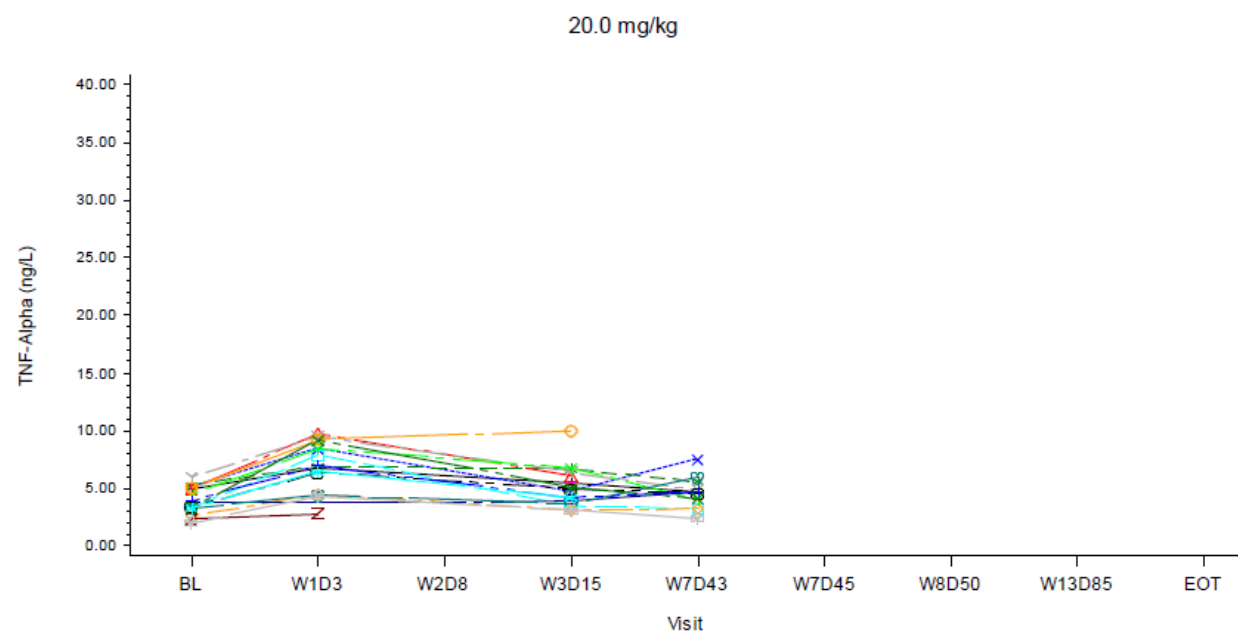

# Phase 1a dose-escalation trial of avelumab

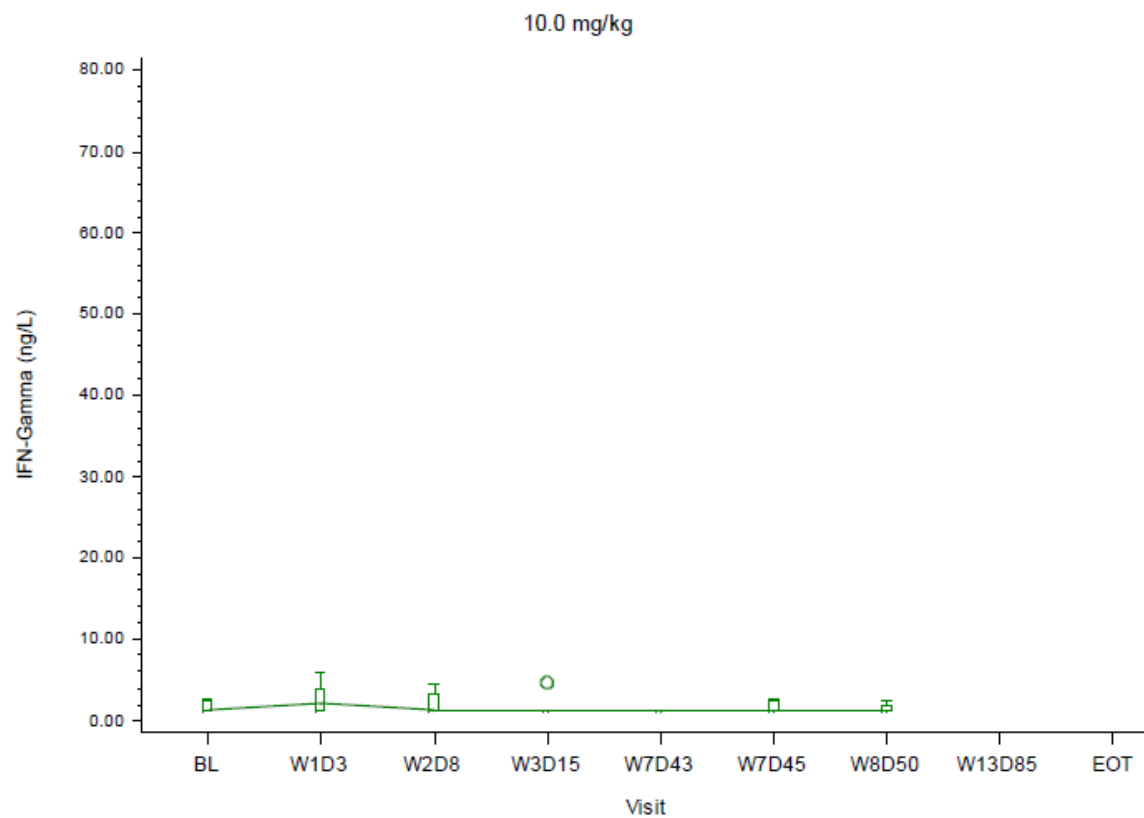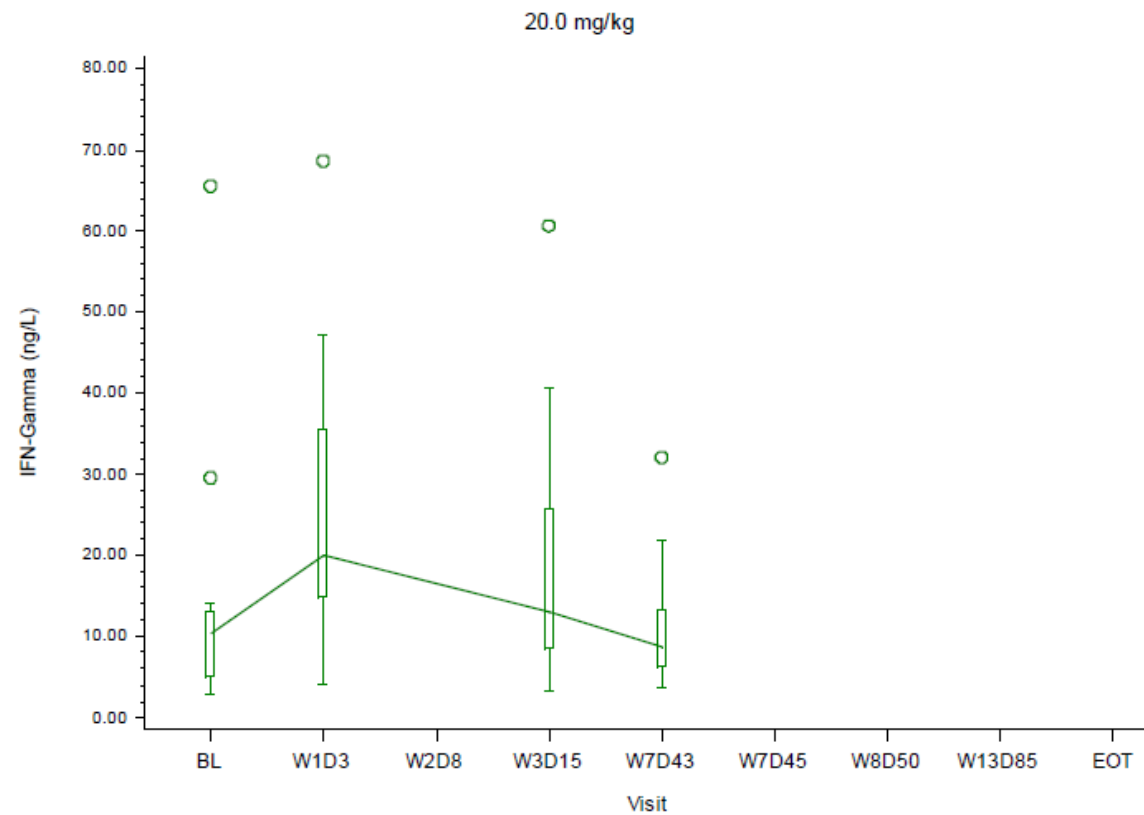

Phase 1a dose-escalation trial of avelumab

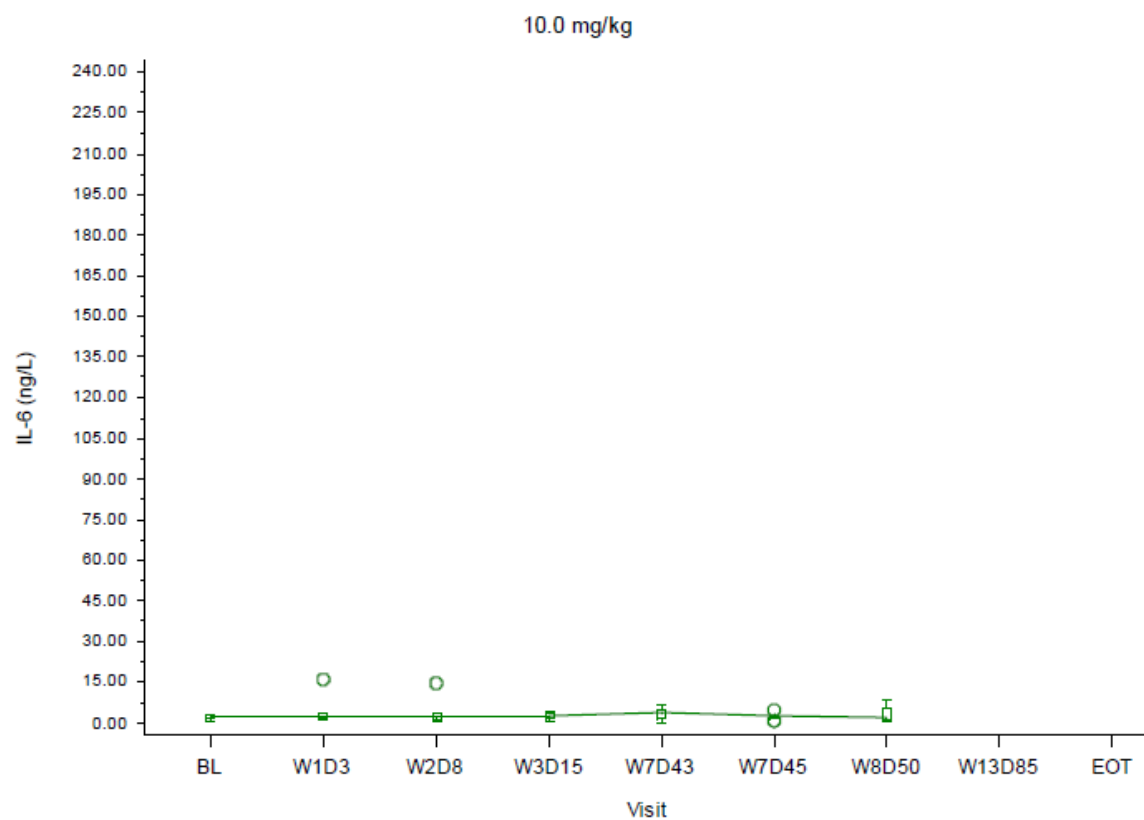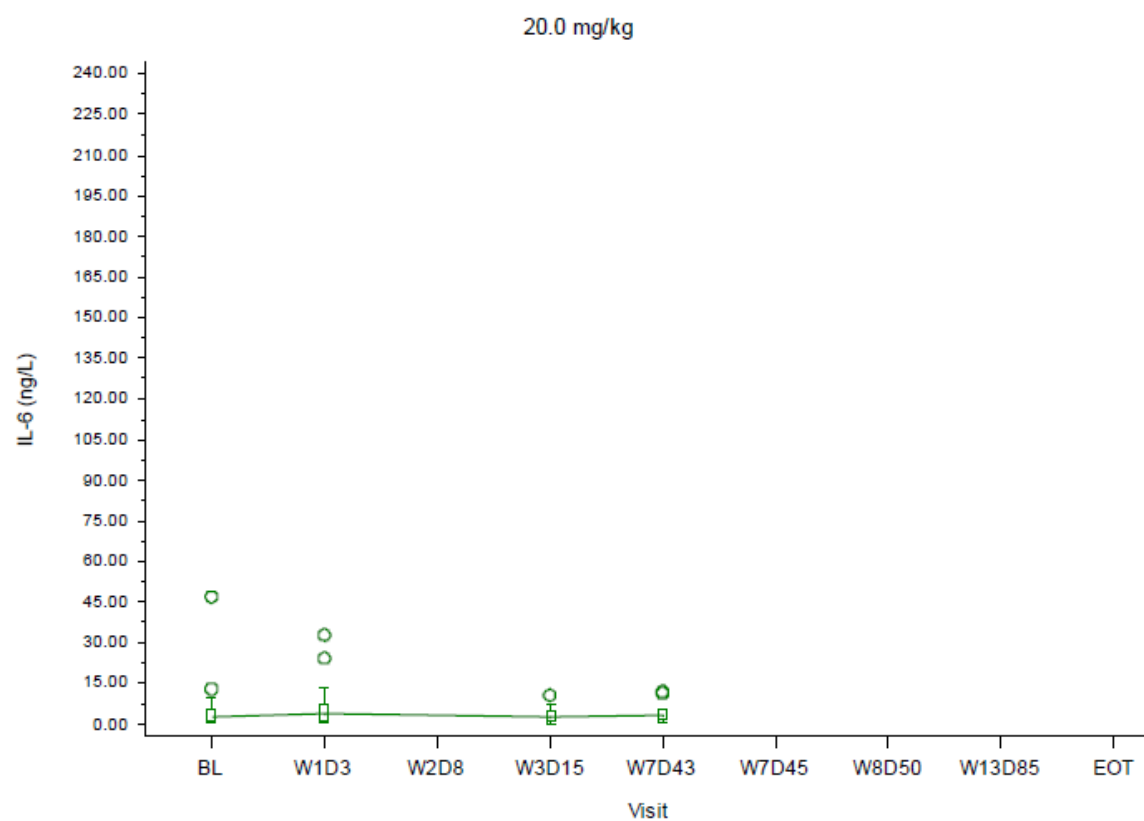

# Phase 1a dose-escalation trial of avelumab

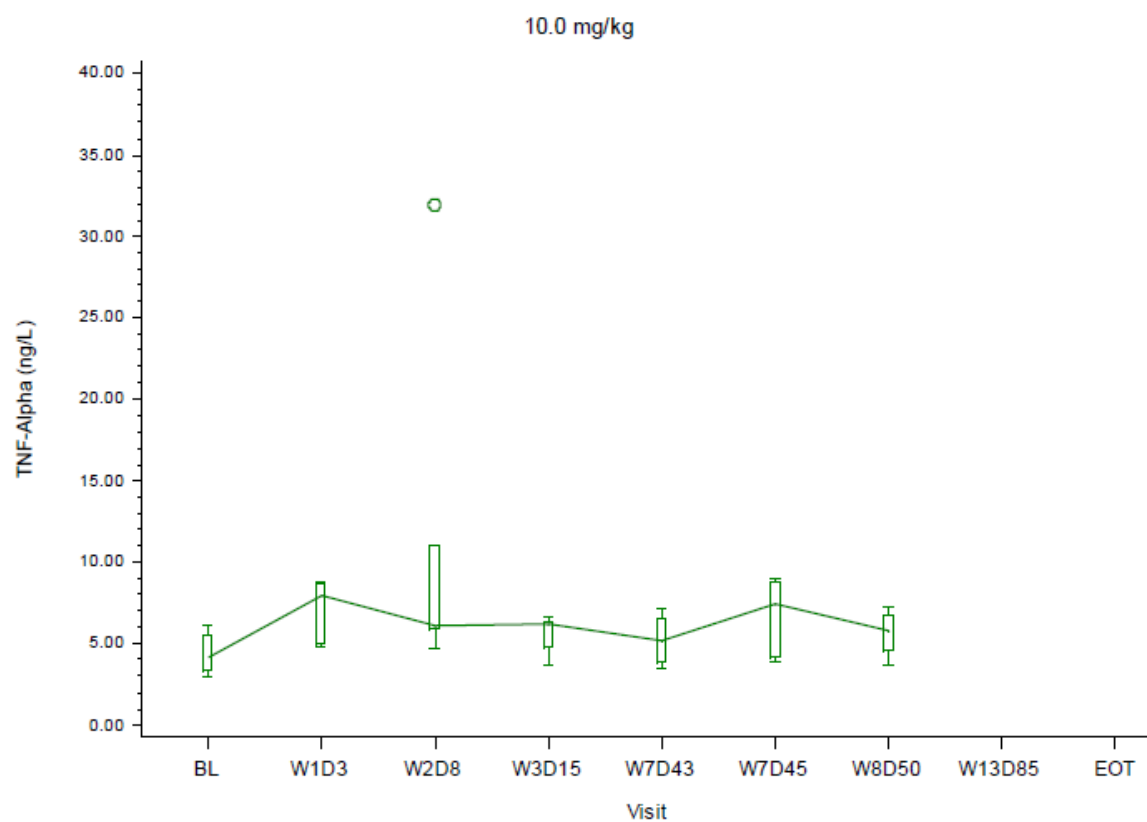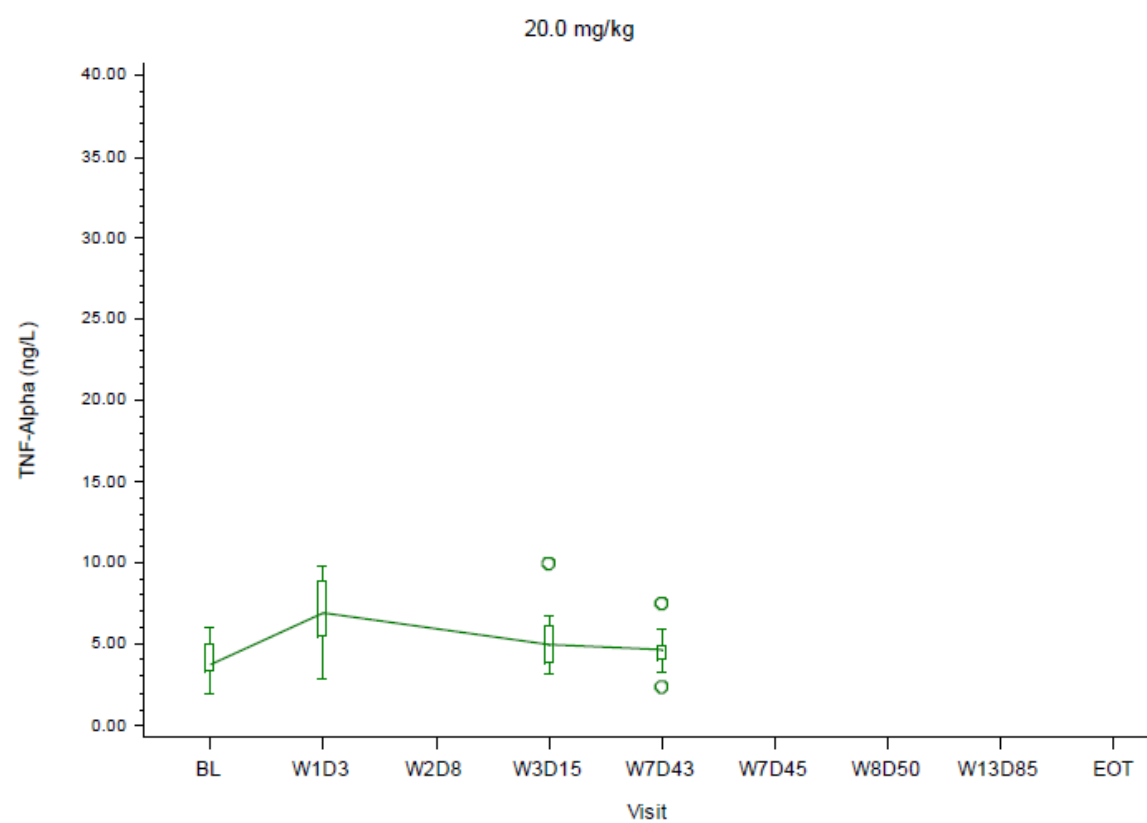

**Figure S2. Evidence of clinical activity with avelumab in phase 1 dose-escalation cohort**

(A) Serum carcinoembryonic (CEA) values in a patient with metastatic colorectal cancer and rising CEA at study enrolment decreased significantly over a 5-month period following initiation of avelumab therapy at dose level 3. Notably, this patient had been treated with two prior therapeutic cancer vaccines. His tumour was *KRAS* wild type and microsatellite stable. (B, C, D) Pretreatment computed tomography scans from a patient with progressive metastatic mesothelioma. Posttreatment images demonstrated a reduction in tumour size in two pulmonary parenchymal metastases (E, F), whereas the pleural mass did not shrink (G), indicating a mixed response in this patient.

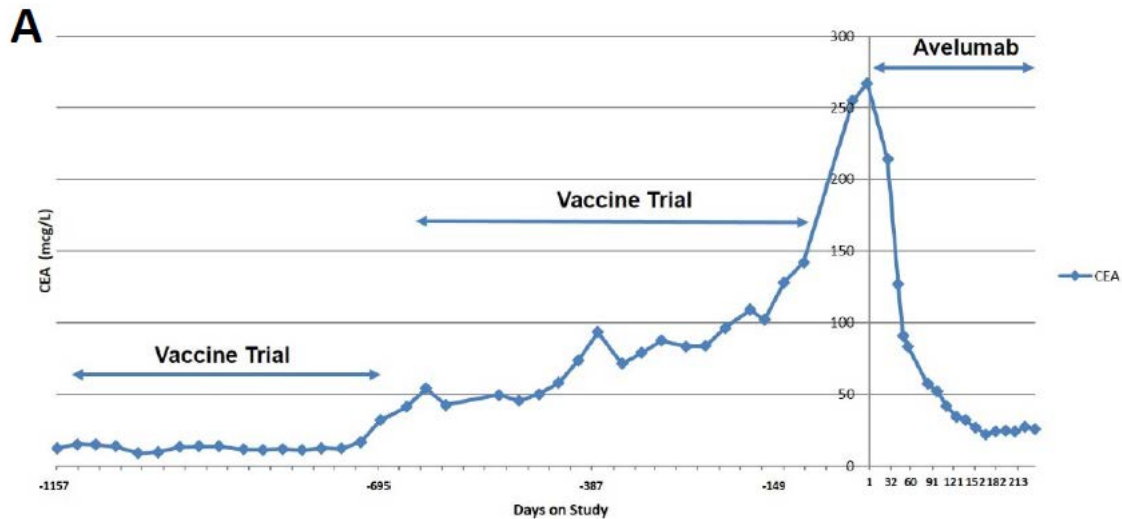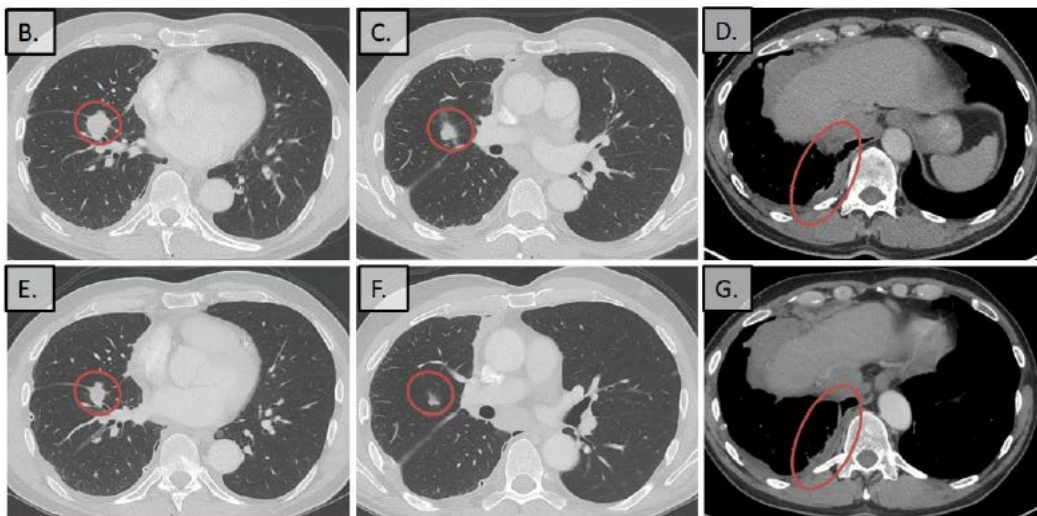

**Table S3. Evaluation of standard and PD-L1–expressing immune cell subsets at baseline, day 15, day 43, and day 127**

Values indicate median % of PBMCs and interquartile range (first and third quartiles).

|                                 | Pre                 | Day 15<br>(n=19)    | Pre                 | Day 43<br>(n=14)    | Pre                 | Day 127<br>(n=16)   |
|---------------------------------|---------------------|---------------------|---------------------|---------------------|---------------------|---------------------|
| <b>Standard subsets</b>         |                     |                     |                     |                     |                     |                     |
| CD4                             | 26<br>(21-41)       | 28<br>(18-41)       | 24<br>(20-38)       | 25<br>(21-40)       | 33<br>(23-40)       | 28<br>(17-35)       |
| CD8                             | 16<br>(9-19)        | 13<br>(10-18)       | 16<br>(9-28)        | 13<br>(10-25)       | 15<br>(11-17)       | 14<br>(7-18)        |
| Treg                            | 1·6<br>(1·3-1·8)    | 1·6<br>(1·4-2·2)    | 1·7<br>(1·4-2·4)    | 1·7<br>(1·5-2·1)    | 1·4<br>(1·4-1·8)    | 1·2<br>(0·9-1·4)    |
| NK                              | 6<br>(3-9)          | 5<br>(4-8)          | 7<br>(5-10)         | 5<br>(4-9)          | 7<br>(4-10)         | 5<br>(4-7)          |
| NKT                             | 1·9<br>(0·9-4·6)    | 1·6<br>(1·0-5·1)    | 1·9<br>(0·9-5·0)    | 1·9<br>(0·8-4·2)    | 1·8<br>(0·9-3·1)    | 1·5<br>(0·7-3·0)    |
| B cells                         | 9<br>(2-12)         | 7<br>(3-11)         | 9<br>(3-12)         | 9<br>(3-11)         | 9<br>(5-14)         | 8<br>(6-13)         |
| cDC                             | 0·3<br>(0·3-0·4)    | 0·3<br>(0·2-0·4)    | 0·4<br>(0·3-0·5)    | 0·4<br>(0·4-0·5)    | 0·3<br>(0·2-0·4)    | 0·2<br>(0·2-0·4)    |
| pDC                             | 0·3<br>(0·2-0·3)    | 0·3<br>(0·2-0·3)    | 0·2<br>(0·2-0·3)    | 0·2<br>(0·2-0·3)    | 0·2<br>(0·1-0·3)    | 0·3<br>(0·2-0·5)    |
| MDSC                            | 4<br>(3-8)          | 6<br>(3-11)         | 4<br>(3-7)          | 6<br>(2-9)          | 4<br>(2-7)          | 5<br>(4-8)          |
| <b>PD-L1–expressing subsets</b> |                     |                     |                     |                     |                     |                     |
| PD-L1+ CD4                      | 0·09<br>(0·06-0·09) | 0·08<br>(0·06-0·09) | 0·09<br>(0·06-0·11) | 0·07<br>(0·05-0·09) | 0·07<br>(0·05-0·09) | 0·07<br>(0·05-0·10) |
| PD-L1+ CD8                      | 0·04<br>(0·03-0·07) | 0·04<br>(0·03-0·07) | 0·05<br>(0·03-0·09) | 0·04<br>(0·03-0·08) | 0·04<br>(0·03-0·05) | 0·04<br>(0·01-0·06) |
| PD-L1+ Treg                     | <0·01               | <0·01               | <0·01               | <0·01               | <0·01               | <0·01               |
| PD-L1+ NK                       | 0·07<br>(0·05-0·09) | 0·07<br>(0·04-0·11) | 0·08<br>(0·05-0·14) | 0·06<br>(0·05-0·10) | 0·04<br>(0·03-0·08) | 0·05<br>(0·04-0·07) |
| PD-L1+ NKT                      | 0·04<br>(0·03-0·07) | 0·04<br>(0·03-0·06) | 0·04<br>(0·03-0·07) | 0·04<br>(0·03-0·06) | 0·02<br>(0·01-0·03) | 0·02<br>(0·01-0·04) |
| PD-L1+ B cells                  | 0·7<br>(0·2-1·2)    | 0·8<br>(0·3-1·3)    | 0·8<br>(0·3-1·3)    | 0·8<br>(0·3-1·3)    | 1·2<br>(0·4-1·9)    | 1·1<br>(0·4-1·5)    |
| PD-L1+ cDC                      | 0·01<br>(0·01-0·02) | 0·01<br>(0·01-0·02) | 0·01<br>(0·01-0·02) | 0·01<br>(0·01-0·02) | 0·02<br>(0·01-0·04) | 0·01<br>(0·01-0·02) |
| PD-L1+ pDC                      | 0·02<br>(0·01-0·05) | 0·01<br>(0·01-0·03) | 0·02<br>(0·01-0·04) | 0·02<br>(0·01-0·06) | 0·02<br>(0·01-0·07) | 0·05<br>(0·02-0·25) |
| PD-L1+ MDSC                     | 0·5<br>(0·4-1·1)    | 0·9<br>(0·5-1·6)    | 0·5<br>(0·3-0·8)    | 0·5<br>(0·4-1·0)    | 0·6<br>(0·3-1·8)    | 1·3<br>(0·5-2·8)    |

cDC=conventional dendritic cell; MDSC=myeloid-derived suppressor cell; NA=not available; NK=natural killer; NKT=natural killer T cell; pDC=plasmacytoid dendritic cell; PD-L1=programmed death-ligand 1; Treg=regulatory T cells.
